# Supplementary material for: Genome-Wide Association Analyses Identify SPOCK as a Key Novel Gene Underlying Age at Menarche
Source: PLOS journal article supplement (doi:10.1371/journal.pgen.1000420), 2009-03-12
Supplement: S1 (10.1371/journal.pgen.1000420.s001) [file journal.pgen.1000420.s001]

**Figure S1**

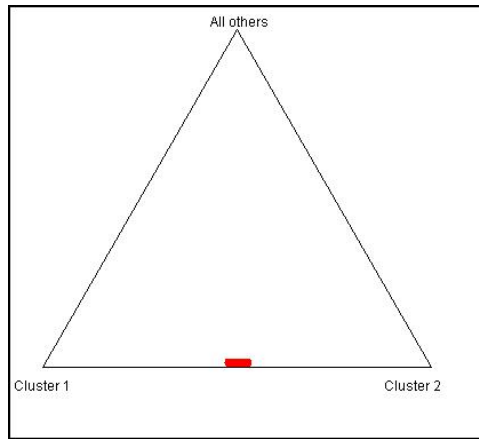

**k = 2**

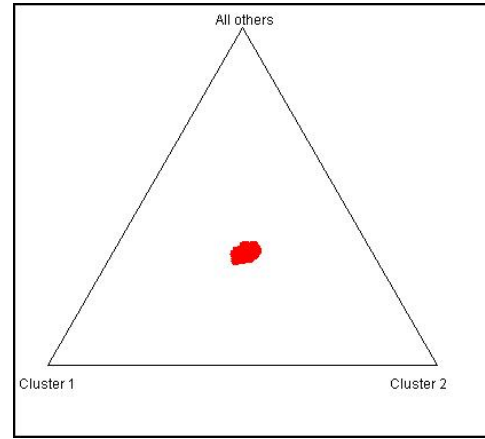

**k = 3**

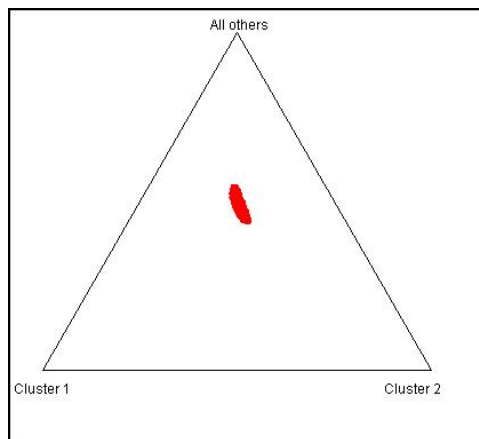

**k = 4**
