# Supplementary material for: Genome-Wide Association Analyses Identify SPOCK as a Key Novel Gene Underlying Age at Menarche
Source: PLOS journal article supplement (doi:10.1371/journal.pgen.1000420), 2009-03-12

Figure S3

$R^2$  matrix

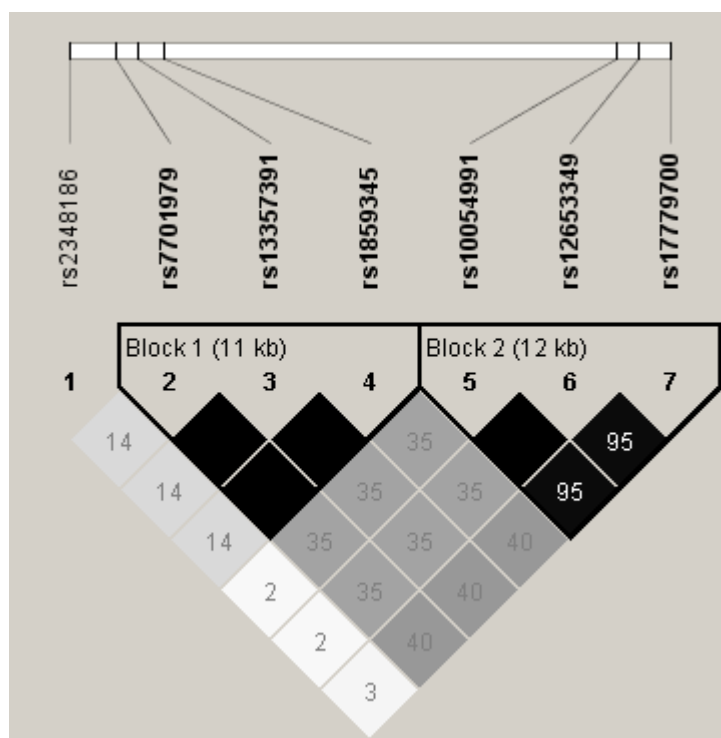

$D'$  matrix

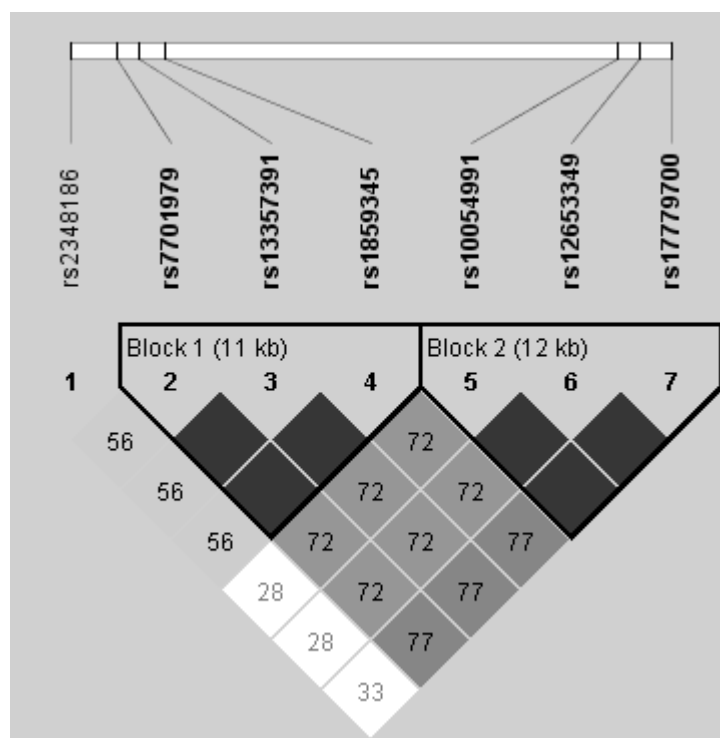

Supplement: S3 (10.1371/journal.pgen.1000420.s003) [file journal.pgen.1000420.s003]
